# Supplementary material for: Establishment of Primary Adult Skin Fibroblast Cell Lines from African Savanna Elephants (Loxodonta africana)
Source: MDPI journal article supplement (doi:10.3390/ani13142353), 2023-07-19
Supplement: s1 [file s1]

**Table S1:** Cell culture and metaphase spread reagents and consumables.

| Reagent/Consumable                                  | Storage                                            | Comments                                                                                                       | Vendor                                                      |
|-----------------------------------------------------|----------------------------------------------------|----------------------------------------------------------------------------------------------------------------|-------------------------------------------------------------|
| <b><u>Cell Culture reagents and consumables</u></b> |                                                    |                                                                                                                |                                                             |
| Thianil®                                            | Room temperature                                   | Dosage/body mass: 3 mg/1 000 kg<br><br>Chemical composition: 10 mg thiafentanil oxalate and 0.1% methylparaben | Wildlife Pharmaceuticals PTY Ltd., Mpumlanaga, South Africa |
| Eagle's Minimum Essential Medium (EMEM)             | 2 – 8°C                                            | Contains Earle's Balanced Salt Solution and L – Glutamine<br>Sterile                                           | Lonza, Walkersville, Maryland, USA                          |
| Fetal Bovine Serum (FBS)                            | -20°C                                              | cEMEM contained 20% FBS<br>Sterile                                                                             | Gibco, Dun Laohaire, Dublin, UK                             |
| Phosphate Buffered Saline (PBS)                     | 2 – 8°C                                            | Sterile                                                                                                        | Gibco, Dun Laohaire, Dublin, UK                             |
| Dimethyl Sulfoxide (DMSO)                           | Room temperature                                   | Freezing media contained 90% FBS and 10% DMSO<br>Sterile                                                       | Sigma-Aldrich Co. LLC, St. Louis, Missouri, USA             |
| Trypsin EDTA solution (1X)                          | Working solution: 2 – 8°C<br>Stock: -20°C          | 1 mL trypsin EDTA solution 1X was used to detach the fibroblasts from a T25 flask<br>Sterile                   | Lonza, Walkersville, Maryland, USA                          |
| Penicillin/Streptomycin/Amphotericin B (P/S/A)      | Working solution: 2 – 8°C<br>Stock solution: -20°C | Transport media contained 10% P/S/A<br><br>Washing PBS contained 10% P/S/A and 2% Gentamicin                   | Lonza, Walkersville, Maryland, USA                          |
| Gentamycin                                          | Room temperature                                   | Initial culturing media contained 20% FBS and 1% P/S/A<br>cEMEM contained 1% P/S                               |                                                             |

|                                                                          |                  |                                                         |                                                    |
|--------------------------------------------------------------------------|------------------|---------------------------------------------------------|----------------------------------------------------|
| Tissue cultured treated flasks (T25)<br>Conical centrifuge tubes (15 mL) | Room temperature | Sterile                                                 | Nest, Biotechnology Co., Ltd., Wuxi, China         |
| Scalpels and surgical blades (size11)                                    | Room temperature | Sterile                                                 | Hi-care Int, Cape Town, South Africa               |
| Glass Pasteur pipets (150 mm)                                            | Room temperature | Marien field laboratory glassware, unplugged<br>Sterile | Lasac, Am Wollerspfad, Lauda-Koningshofen, Germany |
| Glass petri dish (100 mm)                                                | Room temperature | Sterile                                                 | Pyrex, England                                     |
| Serological pipets (2 and 10 mL)                                         | Room temperature | Sterile                                                 | Nest, Biotechnology Co., Ltd., Wuxi, China         |
| Tweezer                                                                  | Room temperature | Sterile                                                 | N/A                                                |

**Metaphase Spread reagents and consumables**

|                                                    |                                                         |                                                                                                |                                            |
|----------------------------------------------------|---------------------------------------------------------|------------------------------------------------------------------------------------------------|--------------------------------------------|
| KaryoMAX™ Colcemid™                                | 2 – 8 °C                                                | Working solution: 10 µg/mL in PBS<br>0.05 µg/mL /petri dish                                    | Gibco, Dun Laohaire, Dublin, UK            |
| Tissue cultured treated petri dish (35 mm x 12 mm) | Room temperature                                        | Sterile                                                                                        | Nest, Biotechnology Co., Ltd., Wuxi, China |
| Trypsin EDTA solution (1X)                         | Working solution:<br>2 – 8°C<br>Stock stored:<br>-20 °C | 0.5 mL trypsin EDTA solution 1X was used to detach the EDFs from a 35 mm petri dish<br>Sterile | Lonza, Walkersville, Maryland, USA         |
| Potassium Chloride (KCl)                           | Powder:<br>room temperature                             | 5.6 g KCl powder was dissolved in 1 L dH <sub>2</sub> O, (0.075 M)                             | Sigma-Aldrich Co. LLC, St.                 |

|                                                                    |                                       |                                                                                                                                                                                                                                                                                                                                                                                                                                                                                         |                                                           |
|--------------------------------------------------------------------|---------------------------------------|-----------------------------------------------------------------------------------------------------------------------------------------------------------------------------------------------------------------------------------------------------------------------------------------------------------------------------------------------------------------------------------------------------------------------------------------------------------------------------------------|-----------------------------------------------------------|
|                                                                    | Working solution:<br>2 – 8°C          |                                                                                                                                                                                                                                                                                                                                                                                                                                                                                         | Louis, Missouri, USA                                      |
| Methanol/Acetic acid solution (3/1)                                | Working solution:<br>room temperature | Cold fixative is not recommended in order to avoid the incorporation of humidity into the cell pellet due to condensation because water will disturb the chromosome spreading                                                                                                                                                                                                                                                                                                           | Merck, Billerica, Darmstadt, Germany                      |
| Romanowsky- Giemsa stain (R – G) staining                          | Stock solution:<br>room temperature   | Solution is protected from light and stable for approximately 1 hour                                                                                                                                                                                                                                                                                                                                                                                                                    | Gurr®, BDH chemicals LTD., Poole, UK                      |
| HEPES (4 – (2 – hydroxyethyl) – 1 – piperazineethanesulfonic acid) | Room temperature                      | <p>HEPES buffer stock solution: 900 mL solution A + 100 mL solution B (0.1 M, pH 6.5)</p> <p>A: Solution A (HEPES sodium salt, <math>C_8H_{17}N_2NaO_4S</math>, Molecular Weight: 260.28): 23,83 g dissolved in 1 L dH<sub>2</sub>O</p> <p>B: Solution B (HEPES, <math>C_8H_{18}N_2O_4S</math>, Molecular Weight: 238.30): 26 g dissolved in 1 L dH<sub>2</sub>O</p> <p>HEPES buffer working solution: 300 mL HEPES buffer stock solution to 700 mL dH<sub>2</sub>O (0.03 M, pH6.5)</p> | Santa Cruz Biotechnology Inc., Dallas, Texas, USA         |
| DPX mounting for histology                                         | Room temperature                      | Mixture of distyrene, a plasticizer, and xylene                                                                                                                                                                                                                                                                                                                                                                                                                                         | Kreatech Biotechnology, Villerweg, Amsterdam, Netherlands |
| Glass slides &<br>Glass coverslips                                 | Room temperature                      | Glass slides were cleaned in methanol                                                                                                                                                                                                                                                                                                                                                                                                                                                   | Lasec, Am Wollerspfad, Lauda-                             |

|  |  |  |                          |
|--|--|--|--------------------------|
|  |  |  | Koningshofen,<br>Germany |
|--|--|--|--------------------------|
